# Supplementary material for: Quality of cochlear implant rehabilitation under COVID-19 conditions
Source: Springer Nature journal article supplement (doi:10.1007/s00106-020-00923-z), 2020-10-09
Supplement: MOESM1 [file 18466994]

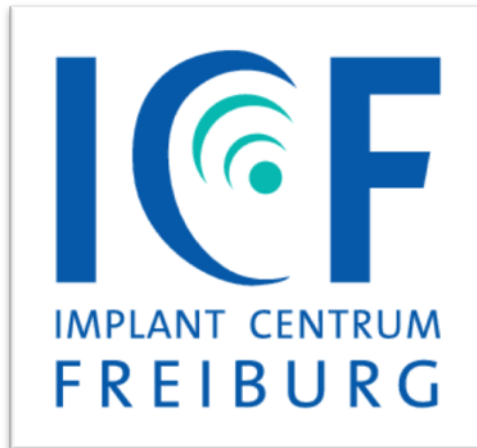

## **Fragebogen**

### **zur Qualitätssicherung der Rehabilitation am ICF im Rahmen der Corona-Pandemie**

**Dieser Fragebogen untersucht die Qualität der Reha. Ziel ist es, die Veränderungen durch die SARS-CoV-2/Corona-Pandemie in der Rehabilitation zu erfassen, wie im beiliegenden Informationsschreiben ausführlich erläutert.**

**Bitte lesen die Fragen genau durch und kreuzen Sie die Antwort an, die für Sie zutrifft oder am ehesten zutrifft. Wir bitten um Beantwortung aller Fragen.**

**Bitte den ausgefüllten Fragebogen in den beiliegenden Umschlag legen und in den Briefkasten mit Aufschrift „Umfrage ICF“ einwerfen. Der Briefkasten hängt in der Eingangshalle im Haus III neben dem Büro von Frau König.**

**Um Ihre Anonymität zu gewährleisten, bitten wir darum, keinen Namen oder Adresse auf dem Umschlag oder Fragebogen zu vermerken.**

**Vielen Dank!**

### 1) Ärztliche Betreuung während der Reha

Die Ärztin oder der Arzt im Implant Centrum war einfühlsam und verständnisvoll

nein    eher nein    teils ja, teils nein    eher ja    ja  
               

Information über Hygienemaßnahmen (z.B. Masken tragen, Händedesinfektion, Abstand halten) wurden verständlich erläutert

nein    eher nein    teils ja, teils nein    eher ja    ja  
               

Mund-Nasen-Masken wurden mir ausgehändigt

nein    eher nein    teils ja, teils nein    eher ja    ja  
               

### 2) Psychologische Betreuung während der Reha

Haben Sie sich bei diesem Aufenthalt einen Termin bei einer unserer Psychologinnen gewünscht?

Ja    Nein  
   

Haben Sie einen Termin bei der Psychologin erhalten?

Ja    Nein  
   

Falls ja, beantworten Sie bitte die folgenden Fragen (sonst weiter mit 3)

Hatten Sie in dem Beratungsgespräch das Bedürfnis, über Ängste und Sorgen aufgrund der aktuellen Corona-Situation zu sprechen?

Ja    Nein  
   

Hat das Gespräch bei der Psychologin Ihnen Anregungen für Ihre alltäglichen Probleme gegeben?

ja    eher ja    teils ja, teils nein    eher nein    nein

Konnte das Gespräch Sie etwas entlasten?

ja      eher ja      teils ja, teils nein      eher nein      nein  
                       

Die Psychologin oder der Psychologe hat mir wichtige Zusammenhänge verständlich erklärt

nein      eher nein      teils ja, teils nein      eher ja      ja  
                       

**3) Haben Sie folgende Behandlungen erhalten? Wenn ja, wie beurteilen Sie diese im Vergleich zur Reha vor Corona?**

**Logopädische Therapie:**

Nein, nicht erhalten      Ja, und sie war im Vergleich  
     

viel besser      besser      gleich gut      schlechter      viel schlechter  
                       

**Musiktherapie/Rhythmik**

Nein, nicht erhalten      Ja, und sie war im Vergleich  
     

viel besser      besser      gleich gut      schlechter      viel schlechter

**Technische Anpassung und Beratung:**

Nein, nicht erhalten

Ja, und sie war im Vergleich

viel besser

besser

gleich gut

schlechter

viel schlechter

**4) Behandlungen während der Reha**

Die Intensität meiner Betreuung und meiner Behandlungen am ICF waren im Vergleich zur früher

viel zu wenig

zu wenig

genau richtig

zu viel

viel zu viel

Ich konnte unter den veränderten Umständen meine Ziele für diesen Aufenthalt

erreichen

weitgehend erreichen

eingeschränkt erreichen

nicht erreichen

**5) Wie beurteilen Sie die Qualität und Güte der Angebote (Betreuungen, Behandlungen und Beratungen) während der Reha?**

Für meine Beschwerden hatte das ICF die richtigen Betreuungen, Behandlungen und Beratungen

nein

eher nein

teils ja, teils nein

eher ja

ja

Wie beurteilen Sie den Umfang der Angebote (Betreuungen, Behandlungen und Beratungen) im Vergleich zu Ihren vorherigen Aufenthalten vor Corona?

Die Häufigkeit meiner Betreuung und meiner Behandlungen am ICF waren im Vergleich zur Vor-Corona-Zeit

viel zu wenig

zu wenig

genau richtig

zu viel

viel zu viel

## 6) Persönlicher Schutz

Die persönliche Schutzausrüstung war während der technischen Betreuung, Logopädie, Psychologische Beratung oder Musiktherapie

störend                      etwas störend                      gar nicht störend                      unbedeutend

                                                                                                                

Die Kommunikation war für mich durch die Persönliche Schutzausrüstung (PSA) erschwert

Ja                                      Nein

                                    

Falls ja:

Besonders störend war für mich...

- die PSA des Therapeuten
- meine eigene PSA

Am wenigsten fühlte ich mich im Rahmen der Anpassung/Logopädie/Psychologische Beratung und Musiktherapie beeinträchtigt durch

Mund-Nasen-Maske      Visier      2m Abstand      Spuckschutz

                                                                                                                

Am stärksten fühle ich mich im Rahmen der Behandlungen beeinträchtigt durch...

Mund-Nasen-Maske      Visier      2m Abstand      Spuckschutz

                                                                                                                

Das Gespräch mit anderen Rehabilitanden außerhalb der Therapie ist für mich...

unwichtig                      weniger wichtig                      wichtig                      sehr wichtig

                                                                                                                

Die Schutzmaßnahmen (Sitzordnung, Abstand usw.) haben hierauf...

keinen Einfluss      geringen Einfluß                      mäßigen Einfluß                      starken Einfluß

Durch die Maßnahmen, die im ICF getroffen wurden, fühlte ich mich während des Aufenthaltes...

sehr unsicher    unsicher    sicher    sehr sicher  
                                   

Die SARS-COV2-Pandemie halte ich für...

gefährlich    harmlos    weiß nicht  
                       

**7) Wie sehr treffen die folgenden Gefühlsbeschreibungen auf Sie zu?**

Wie bedrohlich empfinden Sie für sich die aktuelle Corona-Situation **im Allgemeinen**?

überhaupt nicht    eher wenig    eher mehr    sehr  
                                   

Wie stark war Ihr Gefühl von Angst aufgrund der aktuellen Corona-Situation **während** Ihres Reha-Aufenthaltes?

überhaupt nicht    eher wenig    eher mehr    sehr  
                                   

Wie stark ist Ihr Gefühl von Angst aufgrund der aktuellen Corona-Situation **im Moment** bei Ihnen?

überhaupt nicht    eher wenig    eher mehr    sehr  
                                   

**8) Therapieablauf während der Reha**

Wann fand die ärztliche Aufnahmeuntersuchung statt?

am Aufnahmetag    am 2. Tag    am 3. Tag  
                       

Wann begannen Ihre Behandlungen?

am Aufnahmetag    am 2. Tag    am 3. Tag

Wie häufig fielen während Ihrer gesamten Reha Behandlungen aus?

|                          |                          |                          |                          |
|--------------------------|--------------------------|--------------------------|--------------------------|
| nie                      | 1-mal                    | 2-mal                    | 3-mal                    |
| <input type="checkbox"/> | <input type="checkbox"/> | <input type="checkbox"/> | <input type="checkbox"/> |

Im Vergleich zur Reha vor Corona fielen Behandlungen...

|                          |                          |                          |
|--------------------------|--------------------------|--------------------------|
| häufiger aus             | gleich häufig aus        | weniger aus              |
| <input type="checkbox"/> | <input type="checkbox"/> | <input type="checkbox"/> |

Falls Behandlungen ausgefallen sind: Ich fühlte mich über die Gründe...

|                          |                          |                          |
|--------------------------|--------------------------|--------------------------|
| gut informiert           | wenig informiert         | nicht informiert         |
| <input type="checkbox"/> | <input type="checkbox"/> | <input type="checkbox"/> |

Ich konnte diese...

|                          |                          |
|--------------------------|--------------------------|
| nachvollziehen           | nicht nachvollziehen     |
| <input type="checkbox"/> | <input type="checkbox"/> |

Der Ausfall der Therapien war...

|                          |                          |
|--------------------------|--------------------------|
| mit Corona verbunden     | unabhängig von Corona    |
| <input type="checkbox"/> | <input type="checkbox"/> |

### 9) Unterbringung während der Rehabilitation

Bitte bewerten Sie:

Das Essen im Implant Centrum waren im Vergleich zur Vor-Corona-Zeit...

|                          |                          |                          |                          |                          |
|--------------------------|--------------------------|--------------------------|--------------------------|--------------------------|
| viel besser              | besser                   | gleich gut               | schlechter               | viel schlechter          |
| <input type="checkbox"/> | <input type="checkbox"/> | <input type="checkbox"/> | <input type="checkbox"/> | <input type="checkbox"/> |

Die Organisation im ICF (z.B. Therapieablauf, Informationen, Terminvereinbarung) war im Vergleich zur Vor-Corona-Zeit ...

|                          |                          |                          |                          |                          |
|--------------------------|--------------------------|--------------------------|--------------------------|--------------------------|
| viel besser              | besser                   | gleich gut               | schlechter               | viel schlechter          |
| <input type="checkbox"/> | <input type="checkbox"/> | <input type="checkbox"/> | <input type="checkbox"/> | <input type="checkbox"/> |

## 10) Gesamtbewertung: Zufriedenheit mit der Rehabilitation zur Zeit der Corona-Pandemie

Wie beurteilen Sie den Erfolg der Reha-Behandlung am ICF im Vergleich zum letzten Aufenthalt vor Corona?

viel besser      besser      teils, teils      schlechter      sehr schlecht  
                       

Wie würden Sie Ihre Reha-Maßnahme am Implant Centrum insgesamt im Vergleich zum letzten Aufenthalt vor Corona bewerten?

viel besser      besser      teils, teils      schlechter      sehr schlecht  
                       

## 11) Angaben zur Person

Wie oft waren Sie bereits am Implant Centrum zur Reha?

1-3      4-6      7-9      >9 Aufenthalte  
                 

Hatten Sie eine Begleitperson?

Ja      Nein  
     

Sie sind

Männlich      Weiblich  
     

Ihr Alter ist

18-29      30-39      40-49      50-59      60-69      70-79      80 und älter  
                                   

Ich fühle mich einer Risikogruppe bzgl. Corona

zugehörig      nicht zugehörig
